# Supplementary material for: Keeping Control: The Role of Senescence and Development in Plant Pathogenesis and Defense
Source: PubMed Central journal article supplement (PMC4844401; doi:10.3390/plants4030449), 2015-07-13
Supplement: plants-04-00449-s001.pdf [file plants-04-00449-s001.pdf]

## Supplementary File

**Table S1. Marker information for genotyping (Bur × Ler) near-isogenic lines NIL9 and tmNIL130 at variable genomic regions.**

| Marker Name | Chr. | Position (kb)AGI | Forward Primer        | T <sub>m</sub> (°C) | Reverse Primer         | T <sub>m</sub> (°C) | T <sub>a</sub> (°C) | t <sub>e</sub> (s) | Restr. Enzyme | Allelic state NIL9 | Allelic state tmNIL130 |
|-------------|------|------------------|-----------------------|---------------------|------------------------|---------------------|---------------------|--------------------|---------------|--------------------|------------------------|
| BLC2-22     | 2    | 11753            | GAGATATGTGGTTCAAGTCT  | 56                  | AACTCTACGACGCAGATCC    | 58                  | 55                  | 40                 | MnII          | Ler                | Ler                    |
| BLC2-25     | 2    | 11799            | GGAGGGTCCACCACTCGGC   | 66                  | GGCGGAAGGAAGAAAAACACG  | 64                  | 55                  | 40                 | HinfI         | Ler                | Bur                    |
| BLC2-42     | 2    | 12270            | CCGATGAAGAAGAGAGATTG  | 58                  | CACAACGGTCGGATCACGGAT  | 66                  | 55                  | 40                 | NlaIV         | Ler                | Bur                    |
| BLC2-43     | 2    | 12285            | CTTCCCTTCGTGATTCGTTAC | 64                  | GCTAATCCTCGTCTTGCTCTGT | 66                  | 55                  | 40                 | DdeI          | Ler                | Ler                    |
| BLC4-650-2  | 4    | 270              | CAAAGGTGGTTCCTTTTGTTG | 60                  | TGCATTCCACGCTTGATACT   | 58                  | 55                  | 40                 | NdeI          | Ler                | Bur                    |
| EH4-1       | 4    | 2400             | See Reference [188]   |                     |                        |                     |                     |                    |               | Bur                | Bur                    |

Abbreviations: Chr. = chromosome, kb = kilobases, AGI = Arabidopsis Genome Initiative, T<sub>m</sub> = melting temperature, T<sub>a</sub> = annealing temperature, t<sub>e</sub> = elongation time, restr. = restriction.
